# Supplementary material for: A nanoscale, biocompatible and amphiphilic prodrug of cabazitaxel with improved anticancer efficacy against 3D spheroids of prostate cancer cells
Source: Royal Society of Chemistry journal article supplement (doi:10.1039/d0ma00189a), 2020-01-01
Supplement: d0ma00189a1.pdf [file d0ma00189a1.pdf]

## **Supplementary Information**

# **Nanoscale, Biocompatible and Amphiphilic Prodrug of Cabazitaxel with Improved Anticancer Efficacy Against 3D Spheroids of Prostate Cancer Cells**

Ashok Kumar Jangid<sup>a,†</sup>, Deep Pooja<sup>b,†</sup>, Poonam Jain<sup>a</sup>, Sri Vishnu Kiran Rompicharla<sup>c</sup>, Shwathy Ramesan<sup>d,\*</sup>, Hitesh Kulhari<sup>a,\*</sup>

---

<sup>a</sup>*School of Nano Sciences, Central University of Gujarat, Gandhinagar-382030, Gujarat, India.*

<sup>b</sup>*The Centre for Advanced Materials & Industrial Chemistry, <sup>d</sup>School of Engineering, School of Sciences, RMIT University, Melbourne-3000, Australia.*

<sup>c</sup>*Synergia Biosciences, Bangalore, India 560001*

<sup>†</sup>*Authors contributed equally.*

*\*Authors for Correspondence: HK (hitesh.kulhari@cug.ac.in), SR (rameshshwathy@gmail.com)*

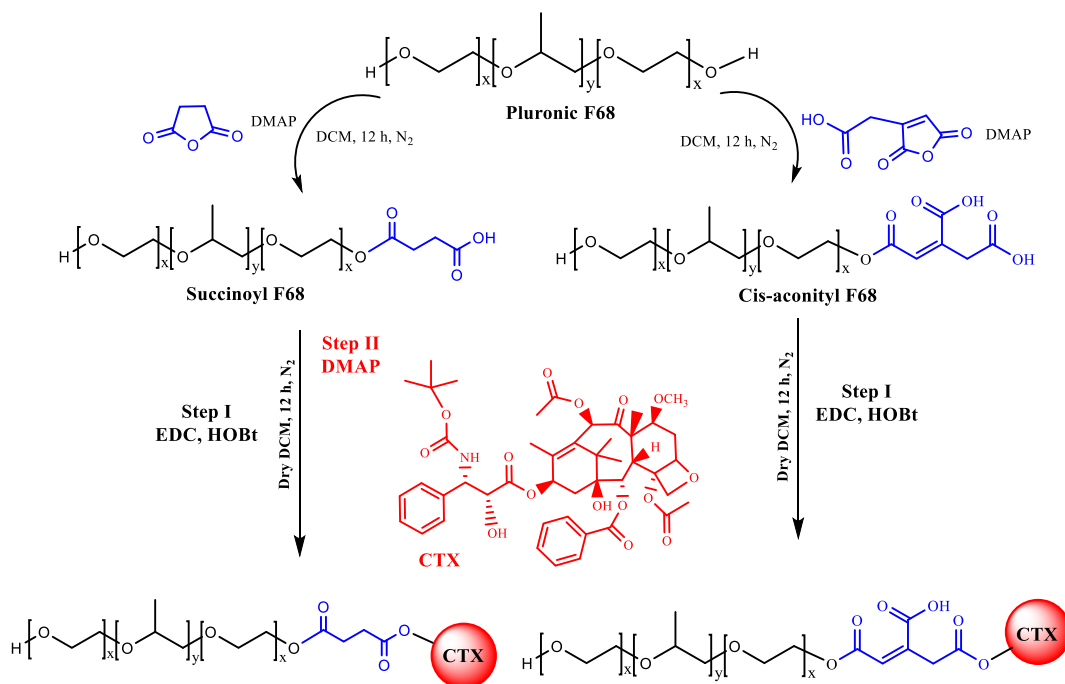

**Figure S1.** Scheme represent the conjugation mechanism of surfactant and cabazitaxel conjugates via succinoyl (F68-SA-CTX) and cis-aconityl (F68-CAA-CTX) redox sensitive linkers.

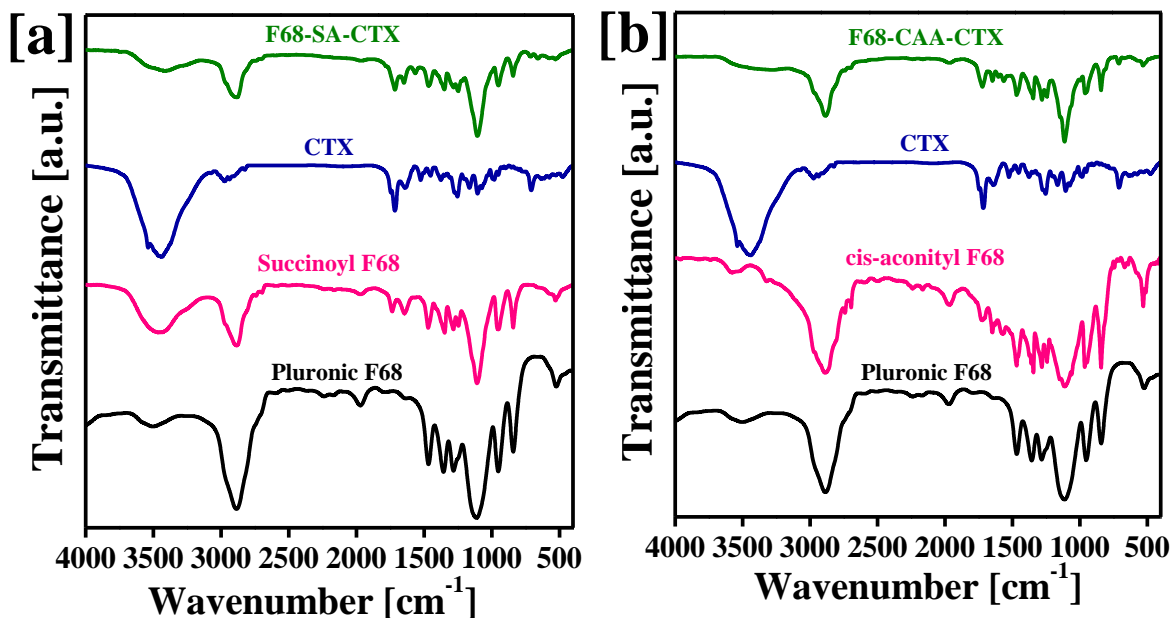

**Figure S2.** FTIR spectra of pure pluronic F68, succinoyl F68, cis-aconityl F68, pure cabazitaxel, pluronic F68- cabazitaxel conjugate via succinoyl linkage (F68-SA-CTX), and pluronic F68-cabazitaxel conjugate via cis-aconitinoyl linkage (F68-CAA-CTX).

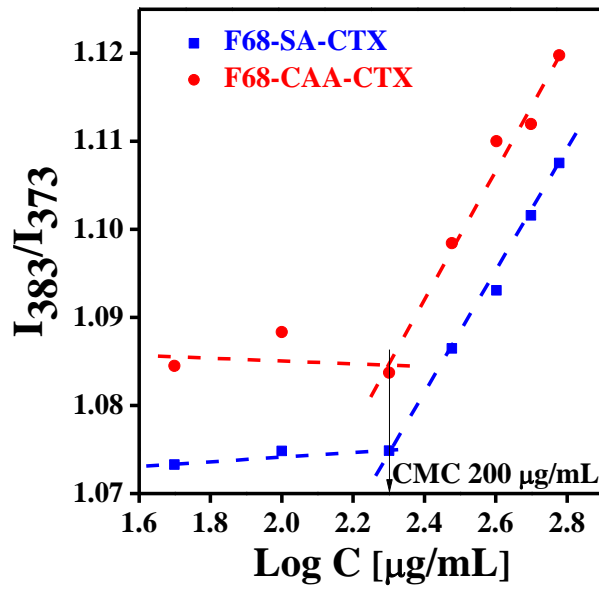

**Figure S3.** Critical micelle concentration (CMC) of pluronic F68-CTX conjugates synthesized via succinoyl (F68-SA-CTX) linker and cis-aconitinyll (F68-CAA-CTX) linker.

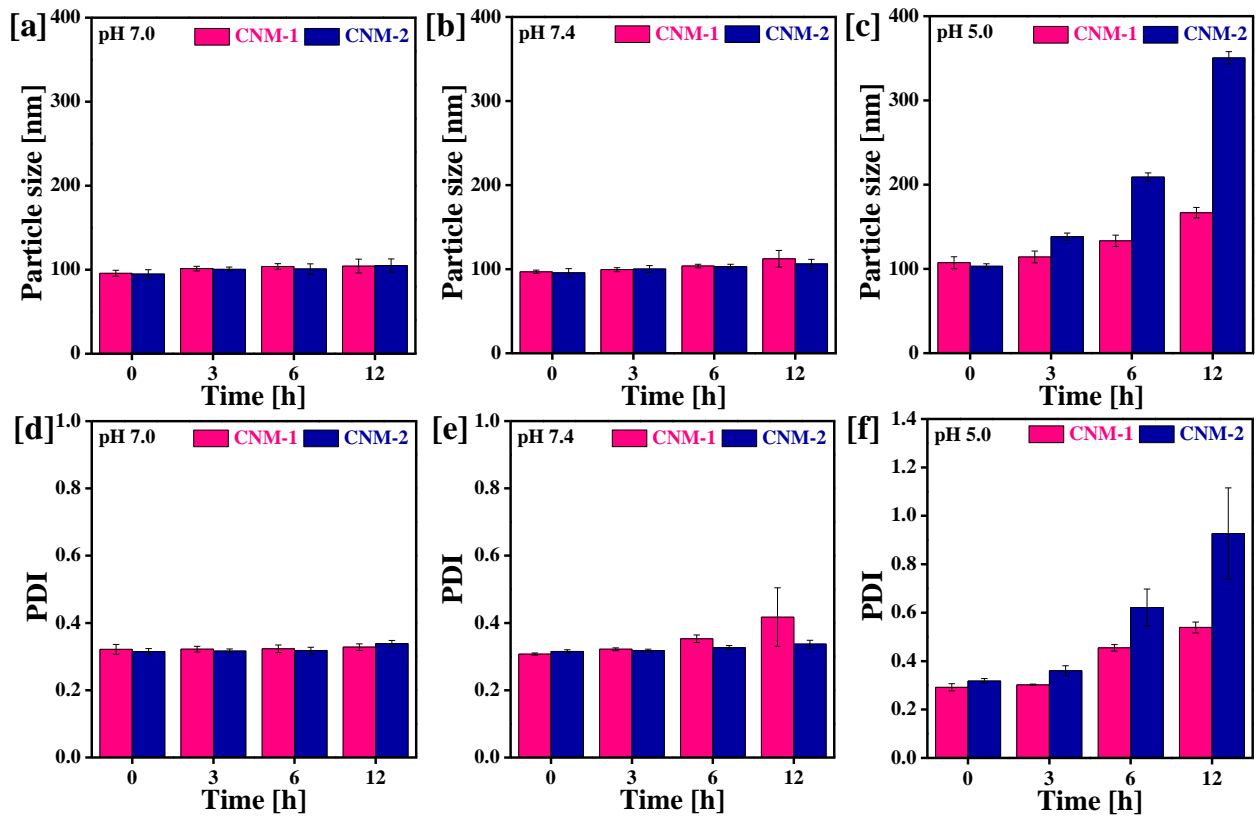

**Figure S4.** Particle size (nm) and polydispersity index (PDI) of F68-SA-CTX conjugate nanomicelles (CNM-1) and F68-CAA-CTX conjugate nanomicelles (CNM-2).

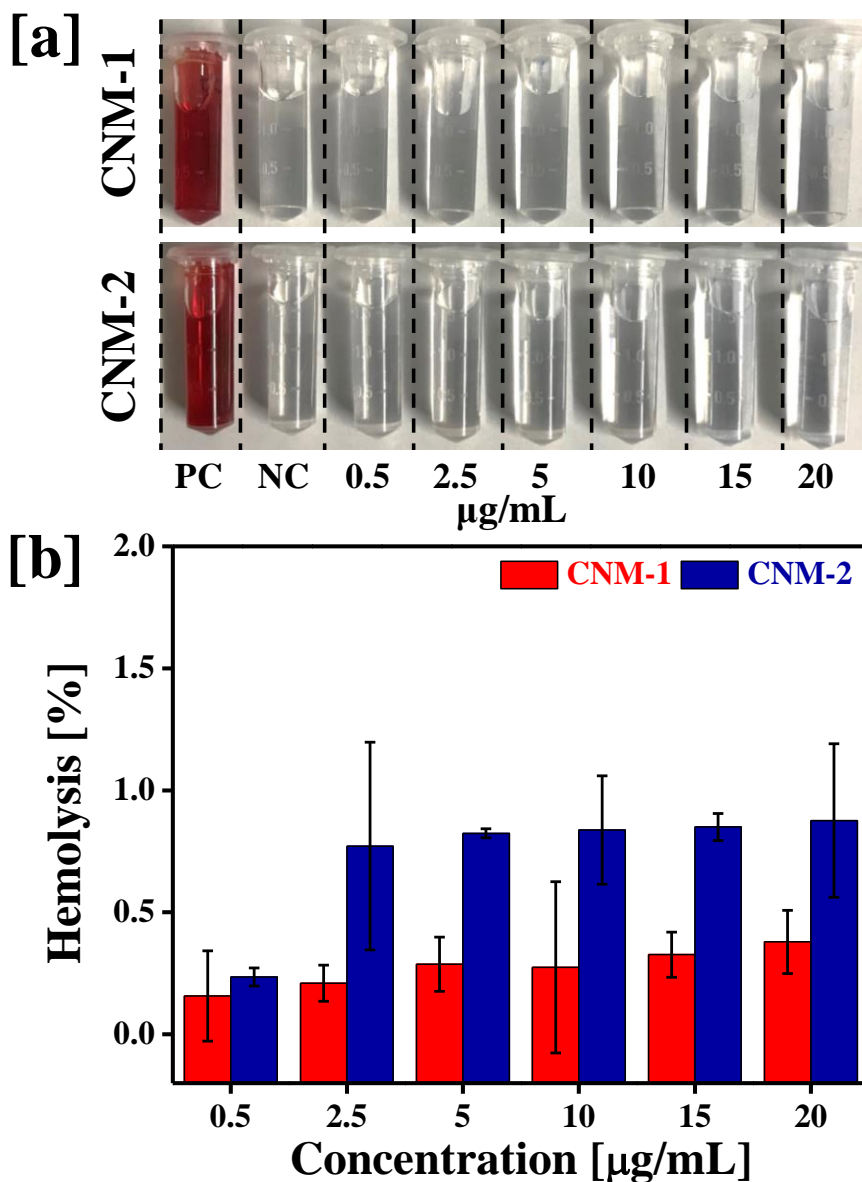

**Figure S5.** (a) Digital images of supernatant after centrifugation of red blood cells (RBCs) treated with F68-SA-CTX conjugate-based nanomicelles (CNM-1) and F68-CAA-CTX conjugate-based nanomicelles (CNM-2). (b) Percentage of hemolysis after incubation of RBCs with CNM-1 and CNM-2. Data was represented in mean  $\pm$ SD.
